# Supplementary material for: Lanthanide chloride complexes of amine-bis(phenolate) ligands and their reactivity in the ring-opening polymerization of ε-caprolactone
Source: Royal Society of Chemistry journal article supplement (doi:10.1039/b802219d), 2008-01-01

## Supplementary Material

for

### Lanthanide chloride complexes of amine bis-phenolate ligands and their reactivity in the ring-opening polymerization of $\epsilon$ -caprolactone

Charlotte E. Willans, Mikhail A. Sinenkov, Georgy K. Fukin, Kristina Sheridan, Jason M. Lynam, Alexander A. Trifonov and Francesca M. Kerton

(*Dalton Transactions*, B802219D)

Note: All NMR spectra were obtained using  $D_8$ -toluene as the solvent. This allowed for comparisons to be made with spectra obtained during kinetics experiments.  $CDCl_3$  which is conventionally used for NMR spectra of P( $\epsilon$ -CL) was not used as this would have reacted with Ln-phenolate bonds. Therefore, some methylene protons of the polymer are masked by the  $-CH_3$  resonances of the deuterated solvent.

For spectral comparison purposes of a hydroxyl-terminated P( $\epsilon$ -CL), readers should consult: *Macromolecules*, 2001, **34**, 4691-4696 and other papers referenced in the main article.

HOCH<sub>2</sub> methylene protons of P( $\epsilon$ -CL) typically appear at 3.65 ppm.

**p.S2** Expansion of 'alcohol' region of the <sup>1</sup>H NMR spectrum of P( $\epsilon$ -CL) prepared using Y(O<sub>2</sub>NN<sup>t-Am</sup>)Cl(THF)

**p.S3** <sup>1</sup>H NMR spectrum of P( $\epsilon$ -CL) prepared using {Gd(O<sub>2</sub>NN<sup>t-Am</sup>)Cl(THF)}<sub>2</sub>, slightly broadened due to residual Gd<sup>3+</sup>

**p.S4** <sup>1</sup>H NMR spectrum of P( $\epsilon$ -CL) prepared using Sm(O<sub>2</sub>NN<sup>t-Am</sup>)Cl(THF)

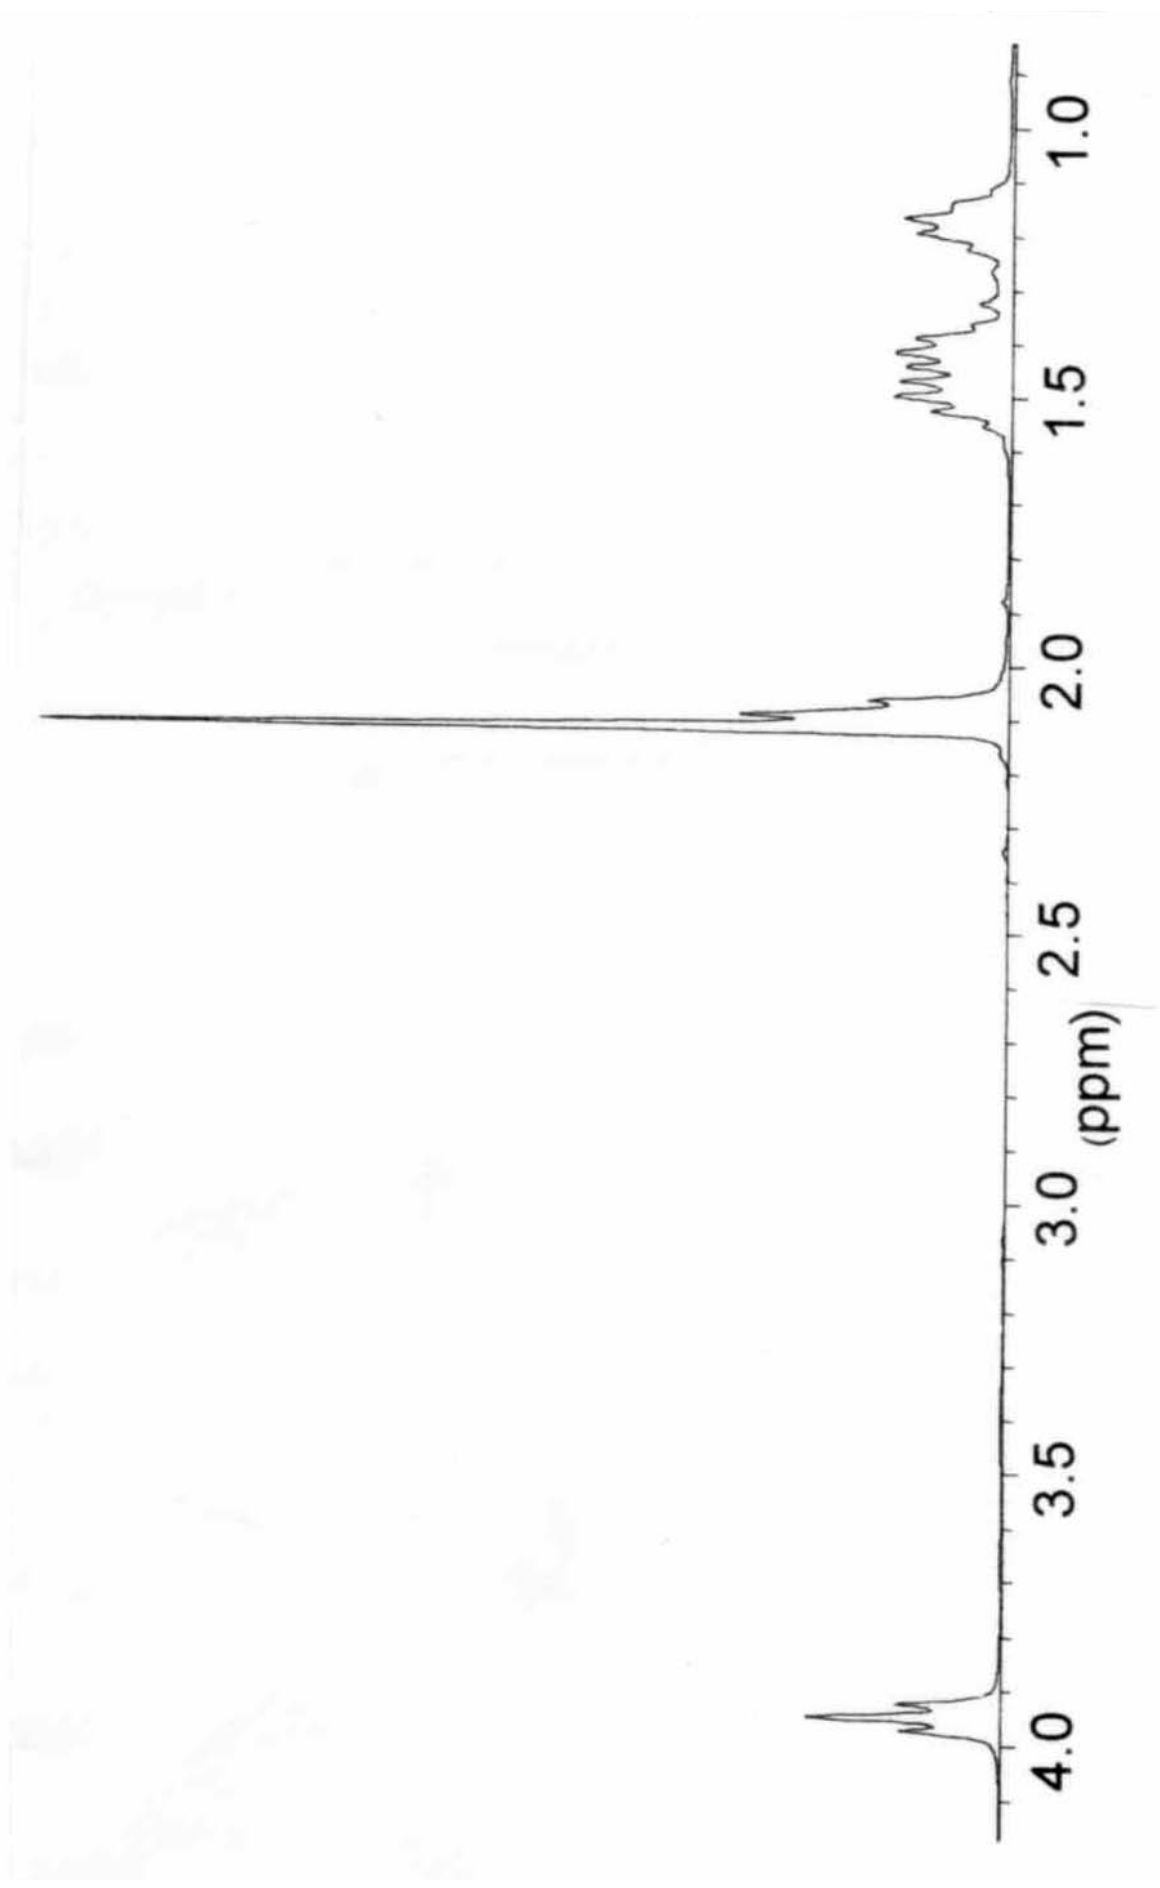

file: b2696cew cew 69/9 in toluene, Gd(O<sub>2</sub>NN<sup>i</sup>)<sub>2</sub>Me<sub>2</sub>, t-Pr Cl

\* residual protons in C7D8

7.0900  
7.0089  
6.9691

3.9761  
3.9541  
3.9321

2.0865  
2.0797  
1.5575  
1.5341  
1.5011  
1.4737  
1.4462  
1.4187  
1.3953  
1.2771  
1.1947  
1.1713

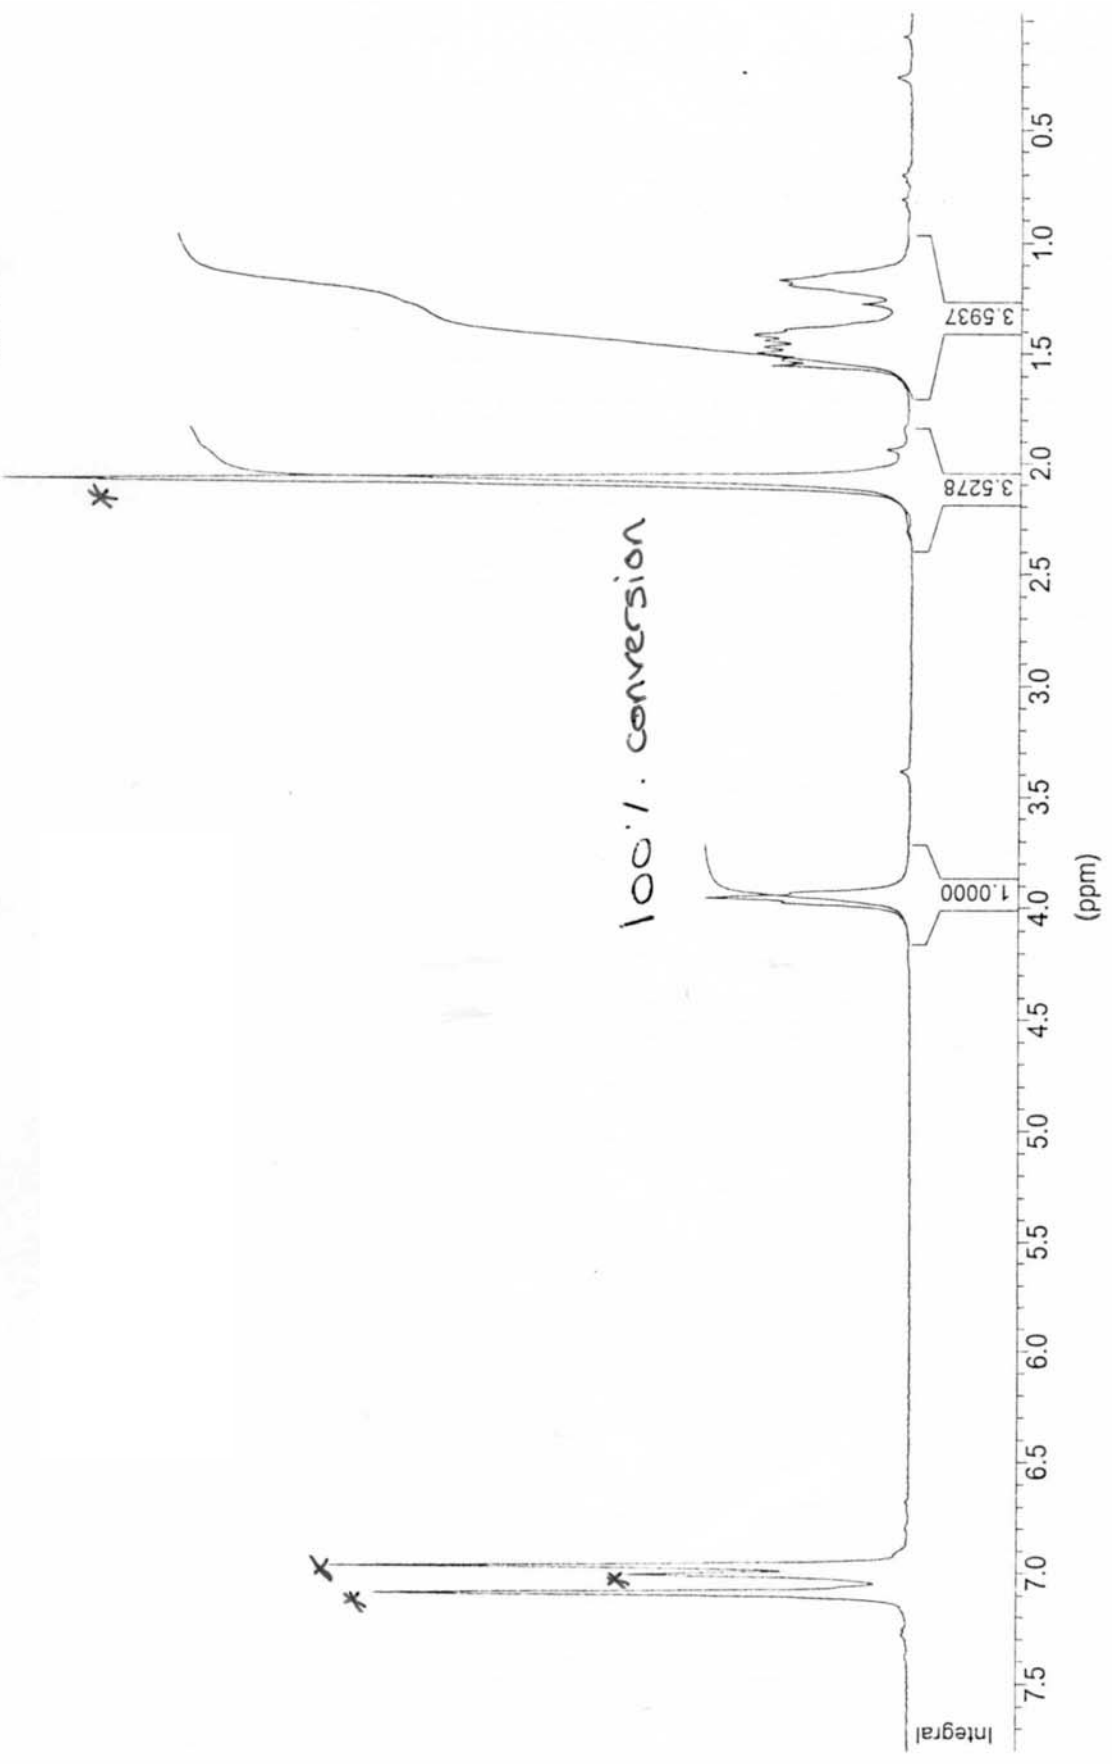

Title: b2693cew cew 69/6 in toluene,  $\text{Sm}(\text{O}_2\text{NN})\text{NMe}_2, t\text{-PeCl}$   
 \* residual protons in C7D8

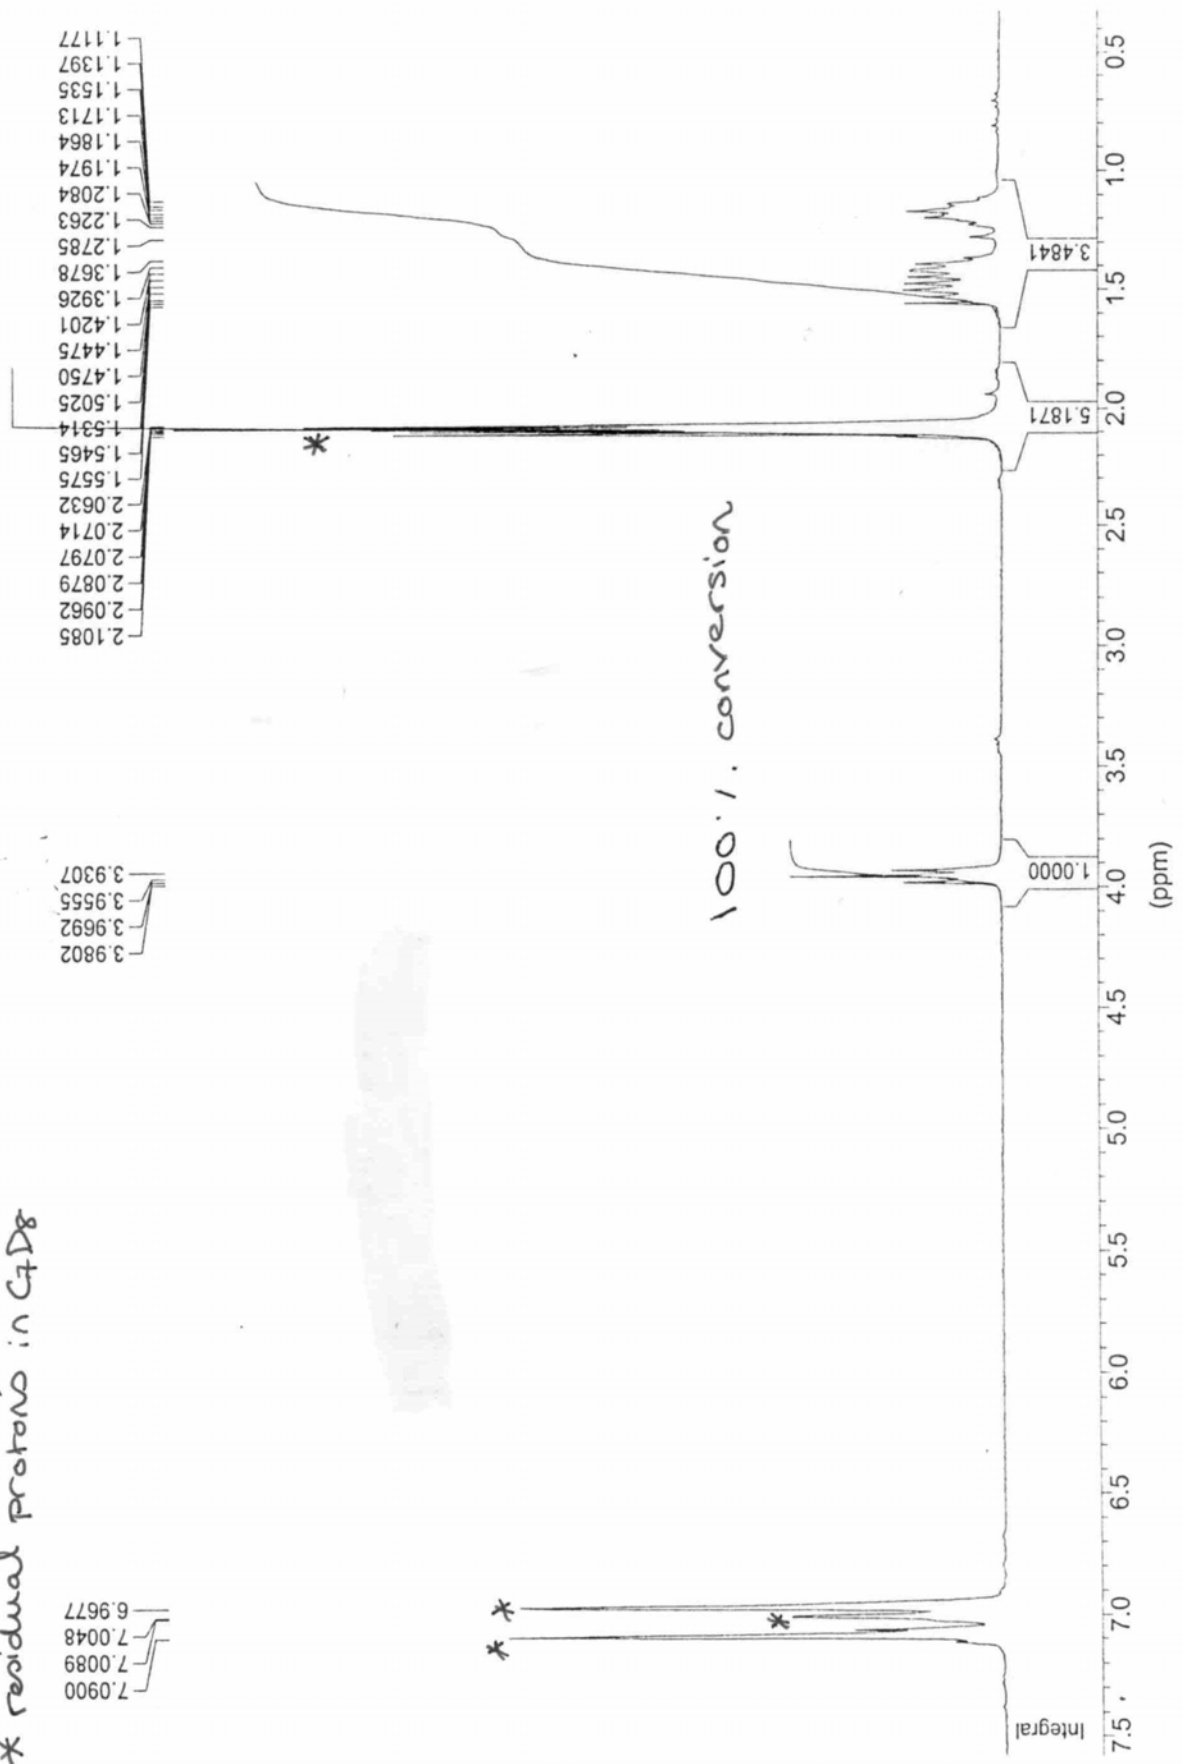

Supplement: b802219d.pdf [file b802219d.pdf]
